# Supplementary material for: A Modified Protocol of Diethylnitrosamine Administration in Mice to Model Hepatocellular Carcinoma
Source: PubMed Central journal article supplement (PMC7432842; doi:10.3390/ijms21155461), 2020-07-30
Supplement: ijms-21-05461-s001.pdf [file ijms-21-05461-s001.pdf]

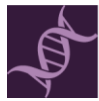

DEN Male

DEN Female

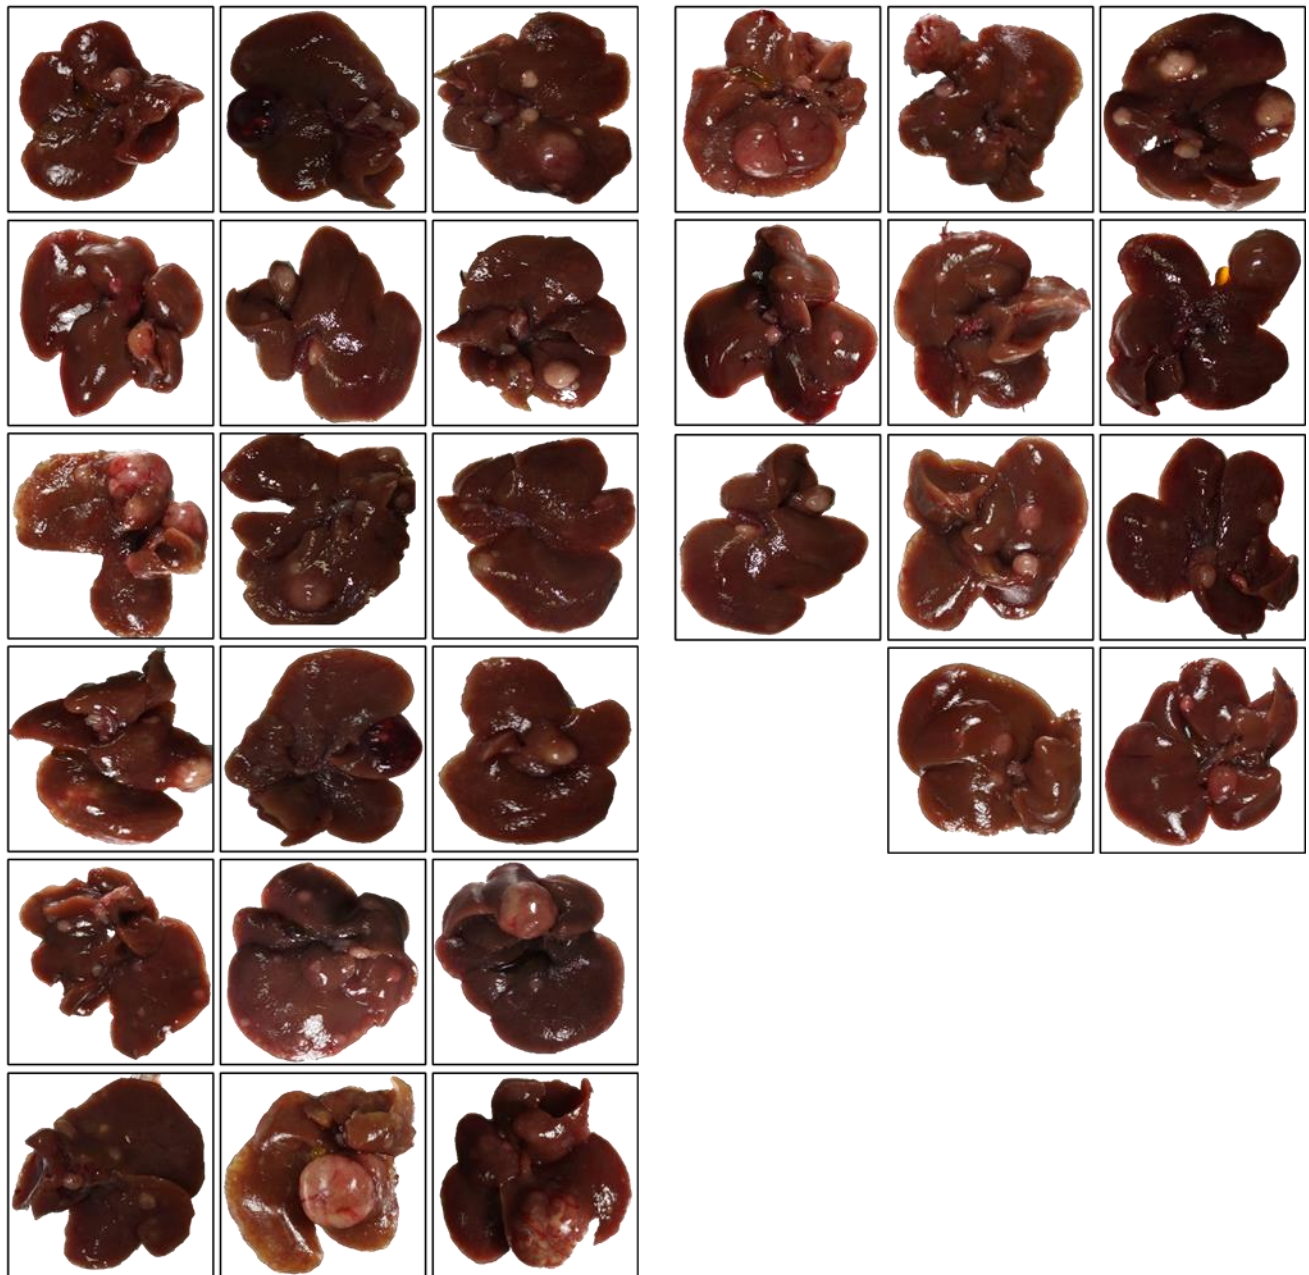

**Figure S1.** Macroscopic view of DEN-treated male and Female. Both male and female group shows a visible tumor in both male and female group.

(a) D+T 4wks Male D+T 4wks Female

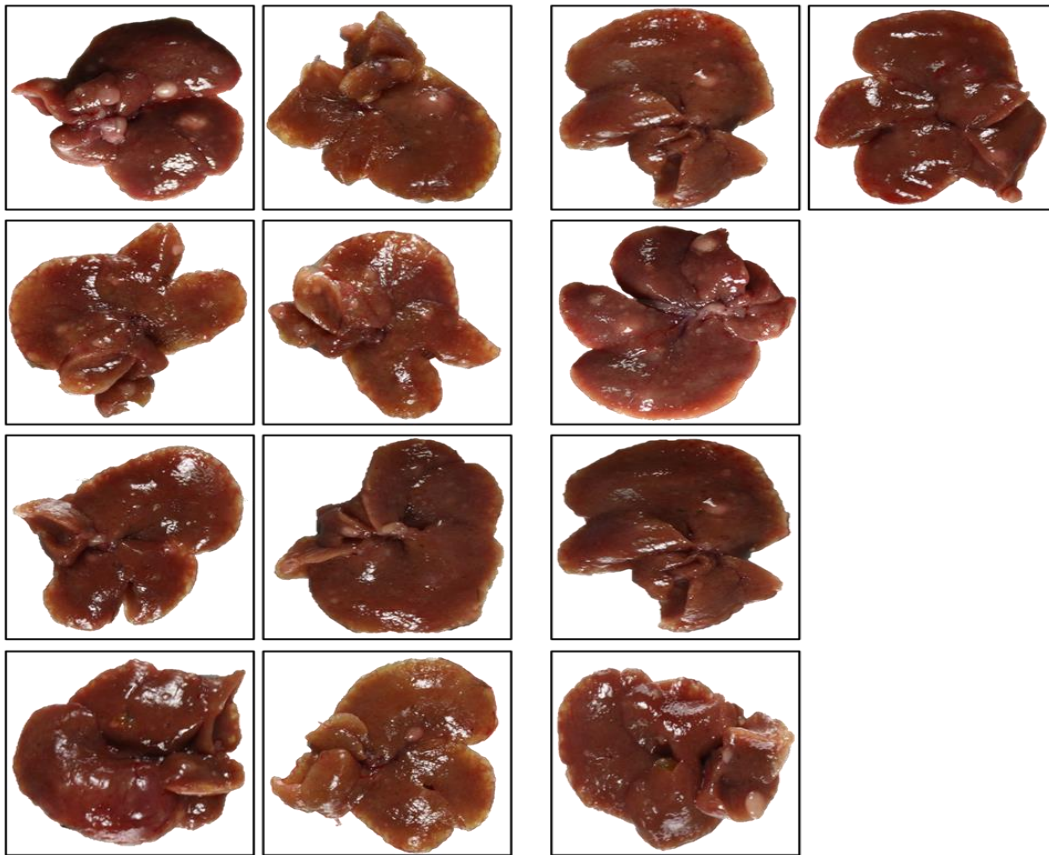

(b) D+T 8wks Male D+T 8wks Female

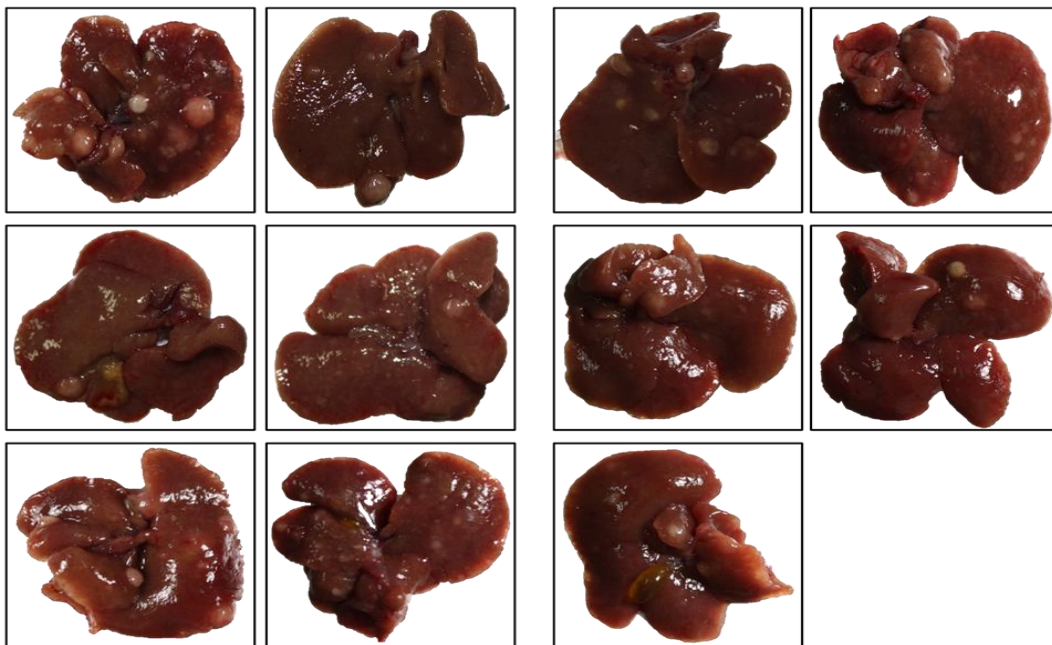

**Figure 2.** Macroscopic view of DEN+TAA treated groups. D+T4wks group (b) D+T8wks group both male and female groups shows a visible tumor as well as cirrhosis development in both 4wk and 8wk groups and male and female groups.

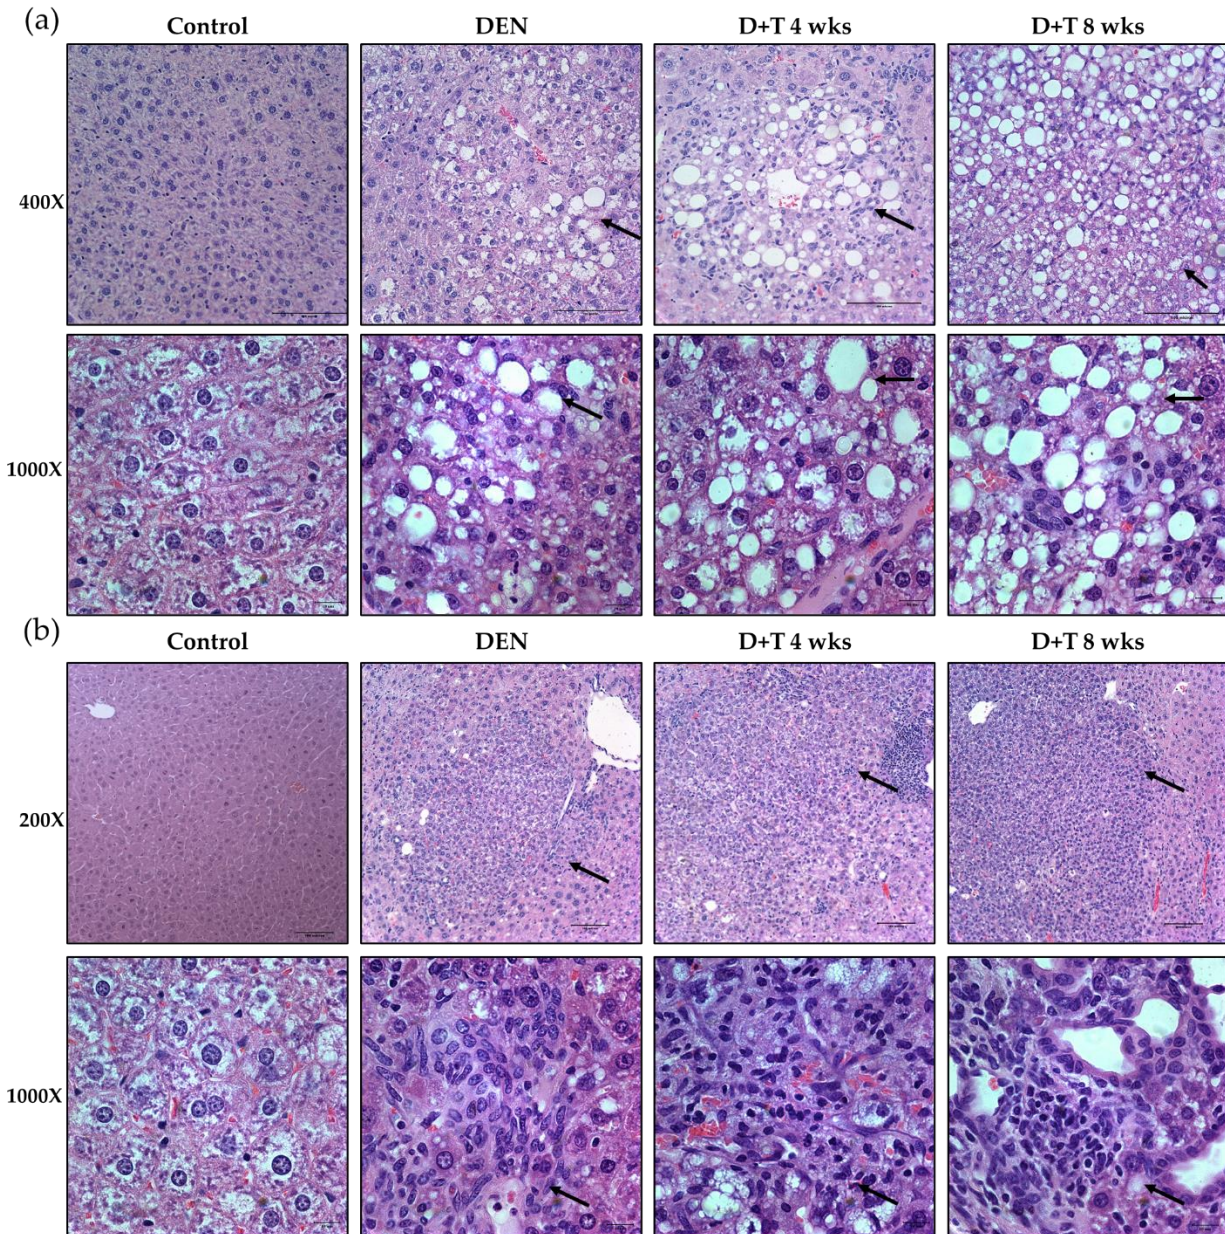

**Figure S3.** The cellular arrangement of HCC that developed in DEN, DEN+TAA 4 weeks, or 8 weeks group (a) some non-tumor area also showing numerous huge pathological vacuoles in hepatocytes suggesting those lipid droplets (indicated with black arrows) accumulated in the liver and that these animals developed hepatic steatosis (400X, & 1000X). (b) Presence of fibrosis showing basophilic foci with crowded nuclei (indicated with black arrows) in the H&E stained section (200X & 1000X).

**Table S1.** Tumor number in all treated groups according to gender.

| Group             | SEX    | Mice # with tumor<br>/total # of mice | Tumor NO. | Tumor NO./animal        |
|-------------------|--------|---------------------------------------|-----------|-------------------------|
| Control           | Male   | 0/7                                   | 0         | 0                       |
|                   | Female | 0/6                                   | 0         | 0                       |
| DEN               | Male   | 18/18                                 | 141       | 7.8±1.83 <sup>#</sup>   |
|                   | Female | 11/11                                 | 63        | 5.73±1.49               |
| DEN+TAA<br>4weeks | Male   | 8/8                                   | 67        | 8±1.11 <sup>*,ns</sup>  |
|                   | Female | 5/5                                   | 39        | 8±1.32 <sup>*</sup>     |
| DEN+TAA<br>8weeks | Male   | 6/6                                   | 77        | 13±2.47 <sup>**,#</sup> |
|                   | Female | 5/5                                   | 49        | 10±0.74 <sup>**</sup>   |

\*\* Significantly different from the DEN group (p<0.01), \* Significantly different from the DEN group (p<0.05), ##Significantly different from the female group (p<0.01), #Significantly different from the Female group (p<0.05), ns (not significant).

**Table S2.** Time to develop the DEN model in previous studies.

| Mice age          |  | Dose                                         | Treatment Time       | Effect                  | References |
|-------------------|--|----------------------------------------------|----------------------|-------------------------|------------|
| 15days old IP     |  | 25mg/kg                                      | 32 weeks             | HCC in male             | [1]        |
| 15days old IP     |  | 25mg/kg                                      | 36 weeks             | 10% HCC<br>100% adenoma | [2]        |
| 14 days of age IP |  | 10 mg/kg                                     | 24 weeks<br>36 weeks | 47% at 36week           | [3]        |
| 15days old IP     |  | 5mg/kg                                       | 48 weeks             | 50 % HCC in wild        | [4]        |
| 15days old IP     |  | 15mg/kg                                      | 36 weeks             | At 36-week HCC          | [5]        |
| 15days old IP     |  | 5ug/g<br>+PB 0.5% in drinking water          | 32 weeks             | 40% HCC                 | [6]        |
| 4-week-old mice   |  | 100mg/kg +PB                                 | 32 week              | 55% HCC in mice         | [7]        |
| 7-week-old mice   |  | 100, 50mg/Kg<br>+CCL <sub>4</sub><br>5ml,8ml | 8,12,16,20 weeks     | 20 visible nodules, HCC | [8]        |

### Supplementary Reference

1. Naugler, W.E.; Sakurai, T.; Kim, S.; Maeda, S.; Kim, K.; Elsharkawy, A.M.; Karin, M. Gender disparity in liver cancer due to sex differences in MyD88-dependent IL-6 production. *Science* **2007**, *317*, 121-124, doi:10.1126/science.1140485.
2. Fan, Y.; Boivin, G.P.; Knudsen, E.S.; Nebert, D.W.; Xia, Y.; Puga, A. The aryl hydrocarbon receptor functions as a tumor suppressor of liver carcinogenesis. *Cancer Res.* **2010**, *70*, 212-220, doi:10.1158/0008-5472.Can-09-3090.
3. Kang, J.S.; Wanibuchi, H.; Morimura, K.; Wongpoomchai, R.; Chusiri, Y.; Gonzalez, F.J.; Fukushima, S. Role of CYP2E1 in thioacetamide-induced mouse hepatotoxicity. *Toxicol. Appl. Pharmacol.* **2008**, *228*, 295-300, doi:10.1016/j.taap.2007.11.010.
4. Riehle, K.J.; Campbell, J.S.; McMahan, R.S.; Johnson, M.M.; Beyer, R.P.; Bammler, T.K.; Fausto, N. Regulation of liver regeneration and hepatocarcinogenesis by suppressor of cytokine signaling 3. *J. Exp. Med.* **2008**, *205*, 91-103, doi:10.1084/jem.20070820.
5. Shang, N.; Bank, T.; Ding, X.; Breslin, P.; Li, J.; Shi, B.; Qiu, W. Caspase-3 suppresses diethylnitrosamine-induced hepatocyte death, compensatory proliferation and hepatocarcinogenesis through inhibiting p38 activation. *Cell Death Dis.* **2018**, *9*, 558, doi:10.1038/s41419-018-0617-7.
6. Awuah, P.K.; Rhieu, B.H.; Singh, S.; Misse, A.; Monga, S.P.  $\beta$ -Catenin loss in hepatocytes promotes hepatocellular cancer after diethylnitrosamine and phenobarbital administration to mice. *PLoS One* **2012**, *7*, e39771.
7. Maeda, S.; Kamata, H.; Luo, J.L.; Leffert, H.; Karin, M. IKK $\beta$  couples hepatocyte death to cytokine-driven compensatory proliferation that promotes chemical hepatocarcinogenesis. *Cell* **2005**, *121*, 977-990, doi:10.1016/j.cell.2005.04.014.
8. Xin, B.; Cui, Y.; Wang, Y.; Wang, L.; Yin, J.; Zhang, L.; Pang, H.; Zhang, H.; Wang, R.A. Combined use of alcohol in conventional chemical-induced mouse liver cancer model improves the simulation of clinical characteristics of human hepatocellular carcinoma. *Oncol. Lett.* **2017**, *14*, 4722-4728, doi:10.3892/ol.2017.6800.
